# Supplementary material
Source: publisher figshare collection journal article supplement (https://gsajournals.figshare.com/ndownloader/files/27743289)
Supplement: Supplementary file 1 [file 27743289]

| **Table S13.** Basic characteristics of reads in 16 libraries and data for sequencing. | | | | | | |  |
| --- | --- | --- | --- | --- | --- | --- | --- |
| **Tissue samples** | **Groups** | **Sample ID** | **Read order** | **Yield (Bases)** | **Reads** | **% of >= Q30** | **Mean quanlity** |
| Liver | NT | N1 | R1 | 2,508,373,885 | 24,835,385 | 94.30 | 35.04 |
| N1 | R2 | 2,508,373,885 | 24,835,385 | 90.15 | 34.14 |
| N2 | R1 | 2,525,568,327 | 25,005,627 | 94.44 | 35.07 |
| N2 | R2 | 2,525,568,327 | 25,005,627 | 91.13 | 34.33 |
| N3 | R1 | 2,508,763,341 | 24,839,241 | 94.42 | 35.06 |
| N3 | R2 | 2,508,763,341 | 24,839,241 | 93.10 | 34.79 |
| N4 | R1 | 2,475,044,996 | 24,505,396 | 94.49 | 35.08 |
| N4 | R2 | 2,475,044,996 | 24,505,396 | 93.06 | 34.75 |
| HT | H1 | R1 | 2,407,232,889 | 23,833,989 | 94.37 | 35.05 |
| H1 | R2 | 2,407,232,889 | 23,833,989 | 89.03 | 33.84 |
| H2 | R1 | 2,483,337,298 | 24,587,498 | 94.67 | 35.10 |
| H2 | R2 | 2,483,337,298 | 24,587,498 | 93.16 | 34.81 |
| H3 | R1 | 2,310,410,754 | 22,875,354 | 94.49 | 35.08 |
| H3 | R2 | 2,310,410,754 | 22,875,354 | 88.65 | 33.75 |
| H4 | R1 | 2,942,685,500 | 29,135,500 | 93.19 | 34.84 |
| H4 | R2 | 2,942,685,500 | 29,135,500 | 90.91 | 34.32 |
| Muscle | NT | N1 | R1 | 2,408,480,037 | 23,846,337 | 94.55 | 35.09 |
| N1 | R2 | 2,408,480,037 | 23,846,337 | 89.57 | 34.14 |
| N2 | R1 | 2,467,196,084 | 24,427,684 | 94.42 | 35.06 |
| N2 | R2 | 2,467,196,084 | 24,427,684 | 92.00 | 34.56 |
| N3 | R1 | 2,326,273,915 | 23,032,415 | 94.50 | 35.08 |
| N3 | R2 | 2,326,273,915 | 23,032,415 | 92.59 | 34.68 |
| N4 | R1 | 2,477,063,885 | 24,525,385 | 94.59 | 35.09 |
| N4 | R2 | 2,477,063,885 | 24,525,385 | 91.20 | 34.43 |
| HT | H1 | R1 | 2,548,415,941 | 25,231,841 | 93.84 | 34.95 |
| H1 | R2 | 2,548,415,941 | 25,231,841 | 87.54 | 33.51 |
| H2 | R1 | 2,372,622,613 | 23,491,313 | 94.33 | 35.05 |
| H2 | R2 | 2,372,622,613 | 23,491,313 | 90.36 | 34.15 |
| H3 | R1 | 2,502,019,571 | 24,772,471 | 94.32 | 35.05 |
| H3 | R2 | 2,502,019,571 | 24,772,471 | 87.97 | 33.61 |
| H4 | R1 | 2,456,545,634 | 24,322,234 | 94.37 | 35.05 |
| H4 | R2 | 2,456,545,634 | 24,322,234 | 88.81 | 33.79 |
